# Supplementary material
Source: PubMed Central journal article supplement (PMC4936777)
Supplement: NIHMS787648-supplement-supplemental.pdf [file NIHMS787648-supplement-supplemental.pdf]

**<sup>1</sup>H NMR (500 MHz, CDCl<sub>3</sub>) 2-fluoro-1,3-diisopropylbenzene (1)**

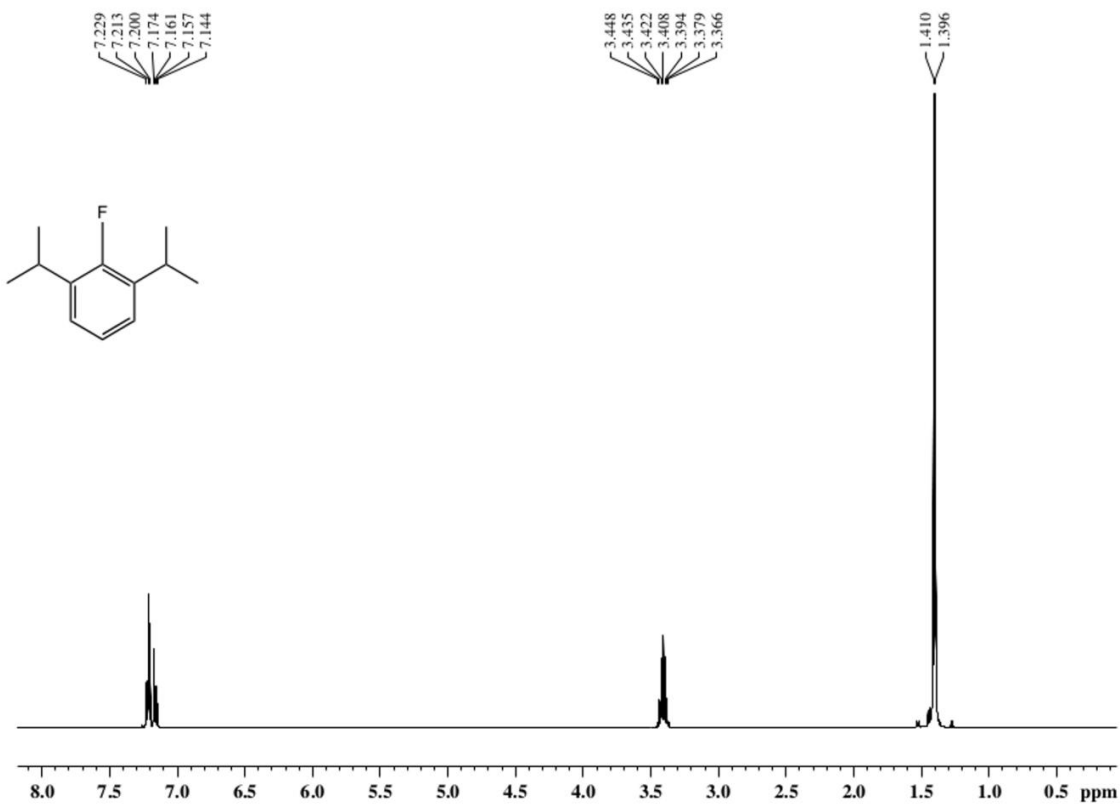

Supplementary Figure 1. <sup>1</sup>H NMR spectra for 2-fluoro-1,3-diisopropylbenzene, or “*fropofol*”

<sup>13</sup>C NMR (125 MHz, CDCl<sub>3</sub>) 2-fluoro-1,3-diisopropylbenzene (1)

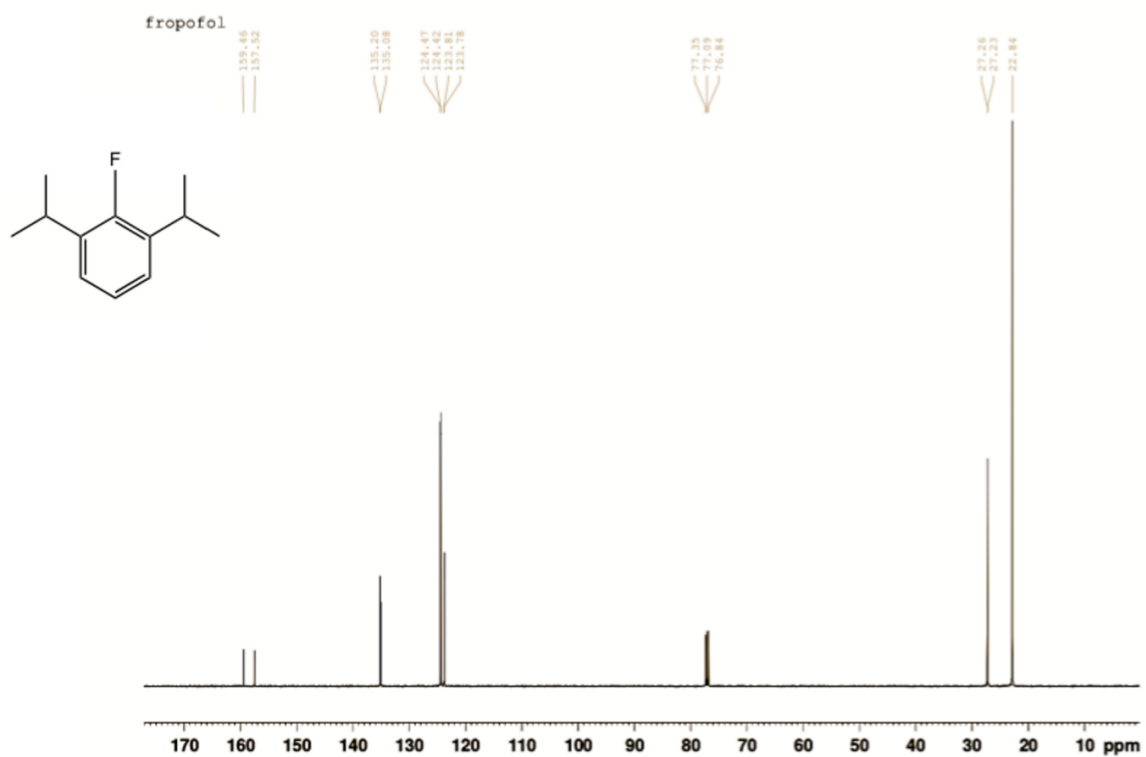

Supplementary Figure 2. <sup>13</sup>C NMR spectra for 2-fluoro-1,3-diisopropylbenzene, or “fropofol”

<sup>19</sup>F NMR (360MHz, CDCl<sub>3</sub>) 2-fluoro-1,3-diisopropylbenzene (1)

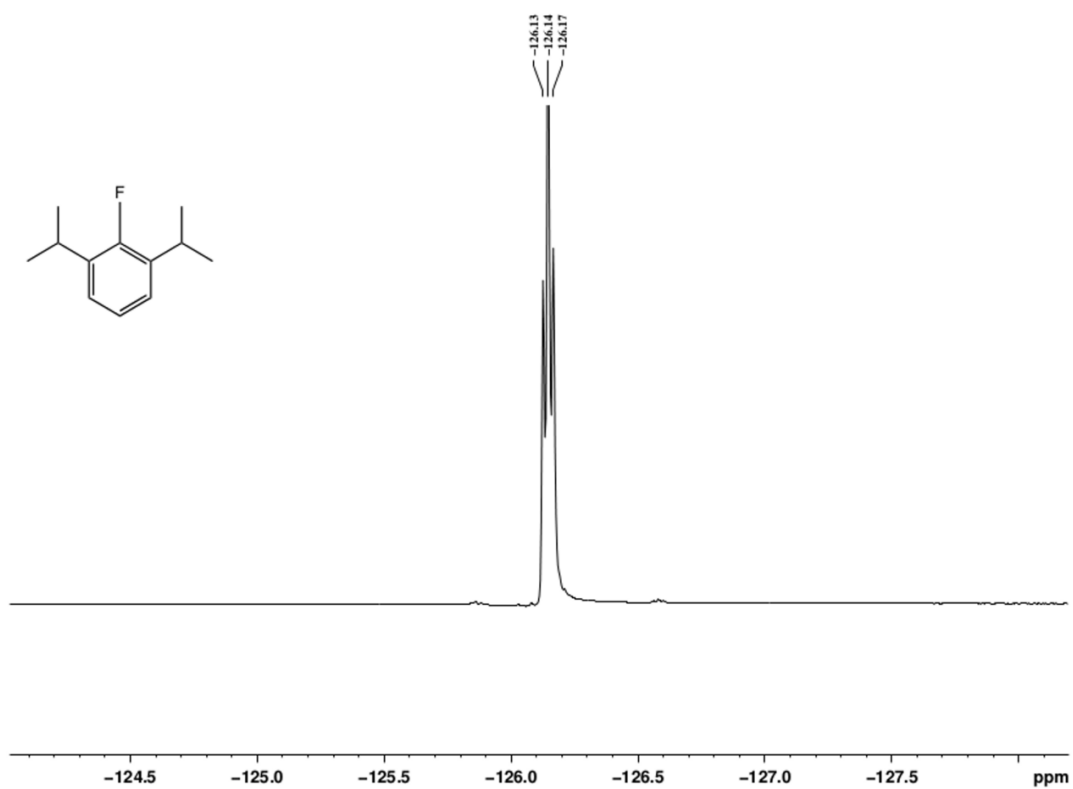

Supplimentry Figure 3. <sup>19</sup>F NMR spectra for 2-fluoro-1,3-diisopropylbenzene, or “*fropofol*”
